# Supplementary material for: LC3/GABARAPs drive ubiquitin-independent recruitment of Optineurin and NDP52 to amplify mitophagy
Source: PubMed Central journal article supplement (PMC6345886; doi:10.1038/s41467-019-08335-6), 2019-01-24
Supplement: 41467_2019_8335_MOESM1_ESM.pdf [file 41467_2019_8335_MOESM1_ESM.pdf]

Supplementary Information

**LC3/GABARAPs drive ubiquitin-independent recruitment of Optineurin and NDP52 to amplify mitophagy**

Padman et al.

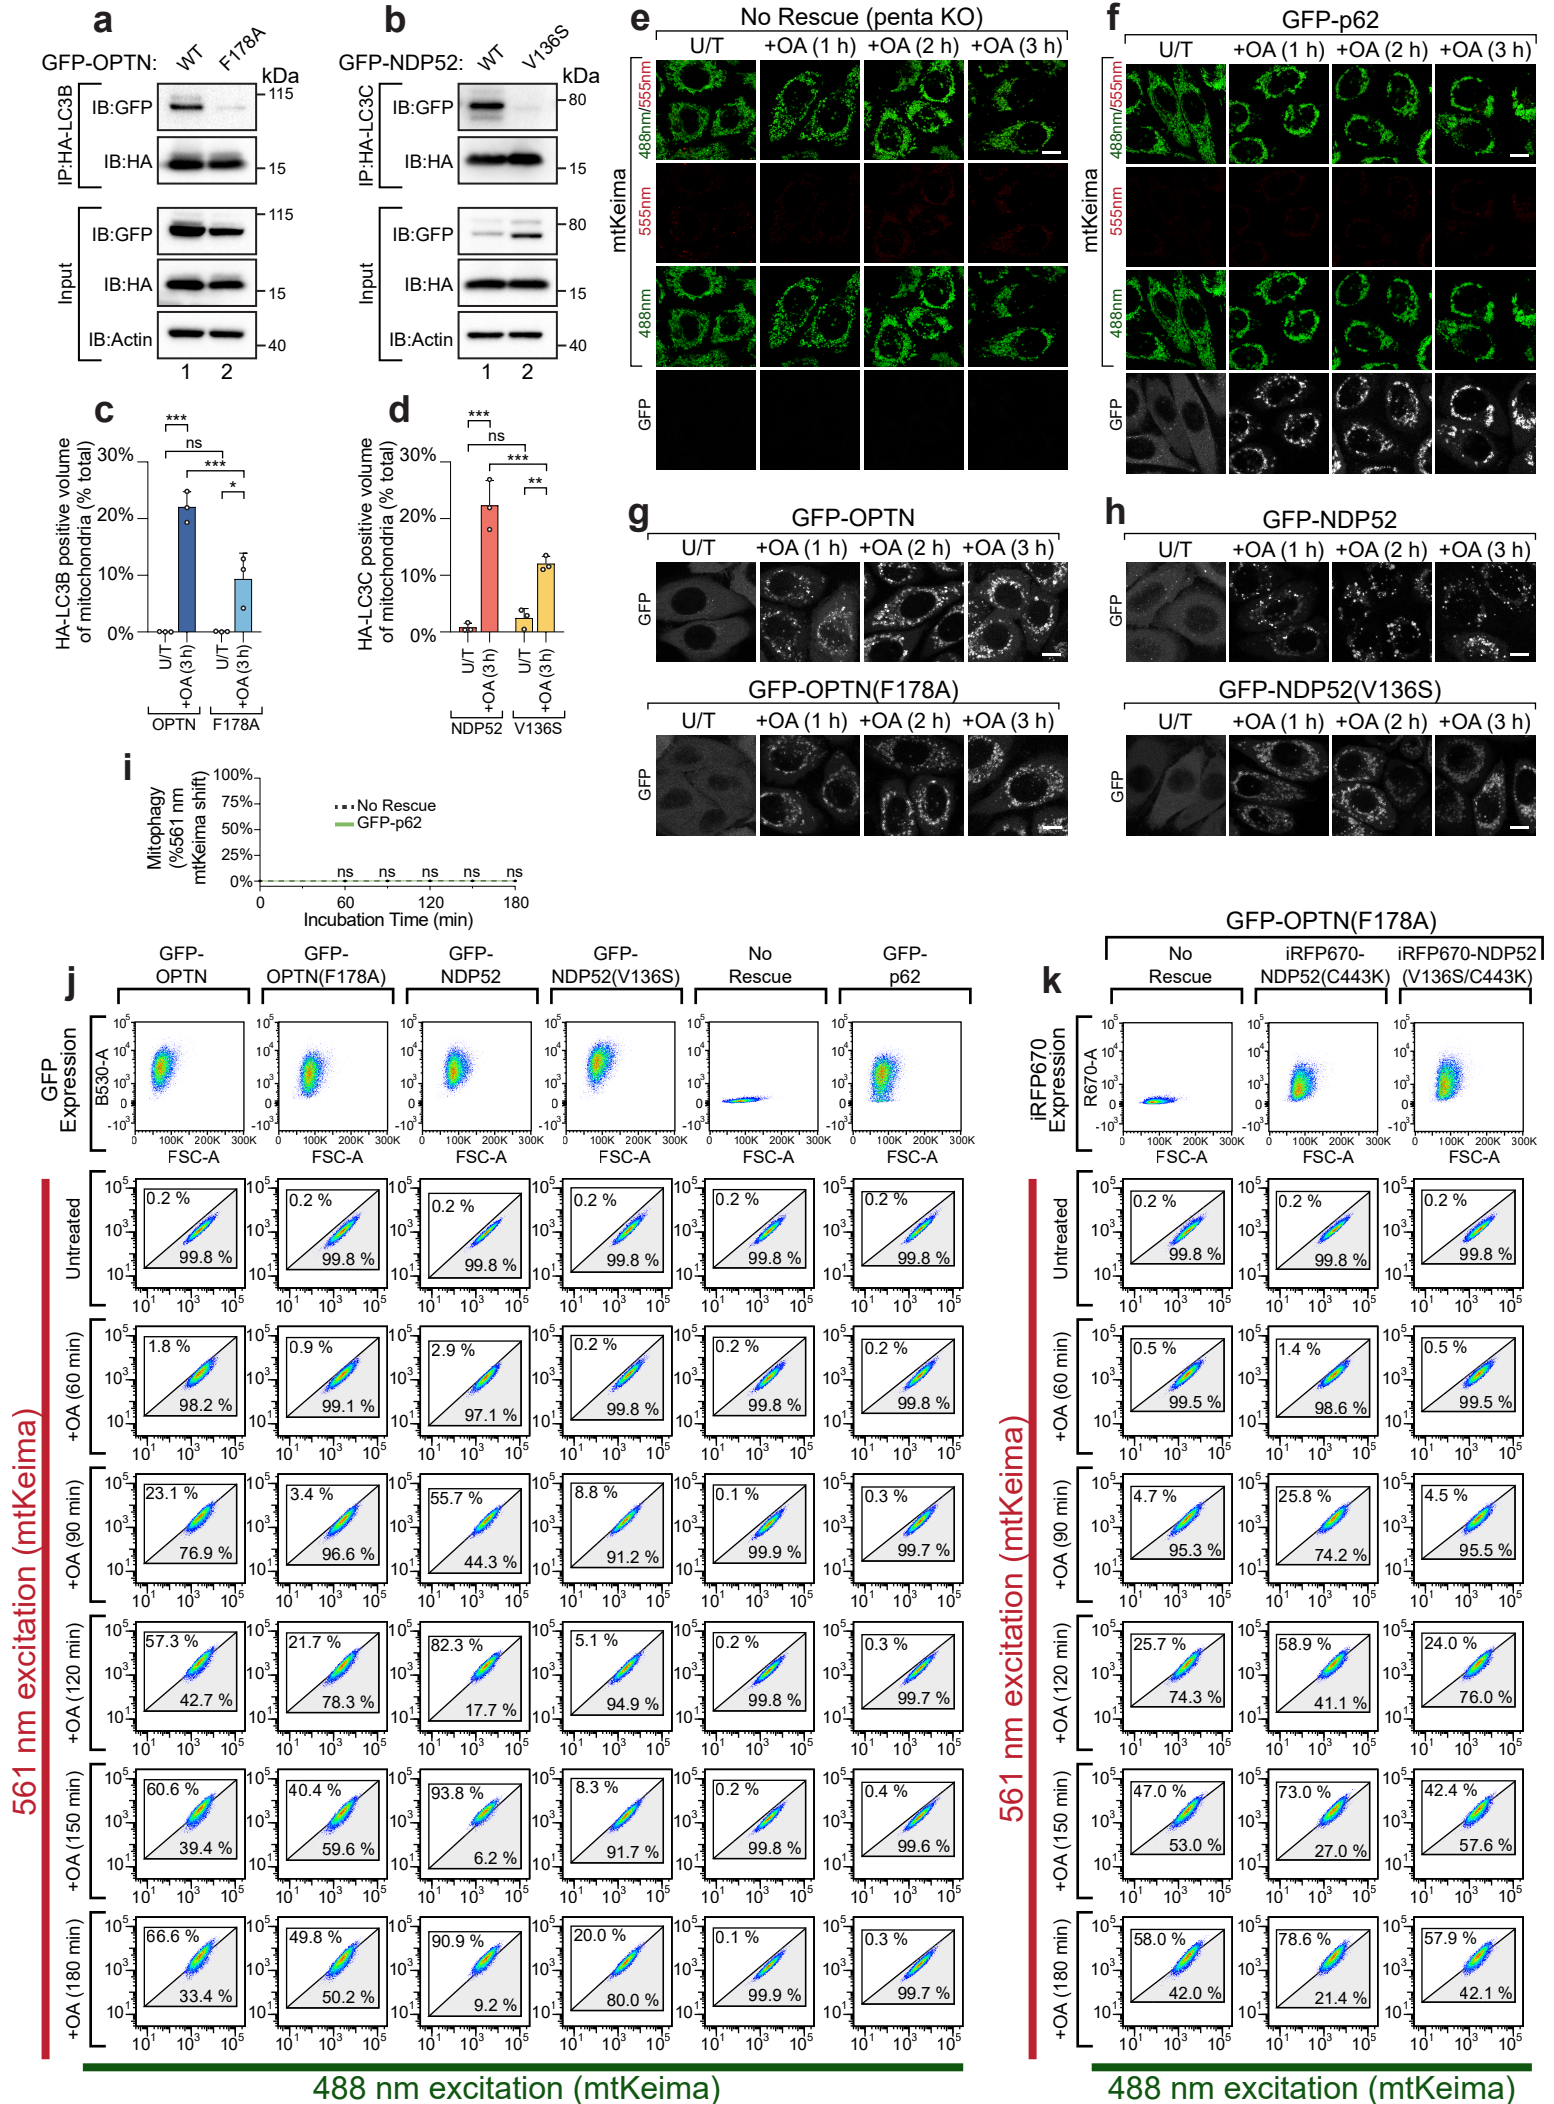



**Supplementary Figure 1: Quantification of the mitophagy defect in LIR mutant autophagy receptors**

**a, b**, Lysates from 1 h OA treated penta KO HeLa cells stably expressing untagged Parkin, with co-expression of HA-LC3B and either WT GFP-OPTN or GFP-OPTN(F178A) (**a**) or HA-LC3C and either WT GFP-NDP52 or GFP-NDP52(V136S) (**b**) were subjected to co-immunoprecipitation using anti-HA beads. Immunoblot analyses of GFP, HA & actin from input lysates are also provided. **c, d**, Automated image analysis of penta KO HeLa cells stably expressing untagged Parkin immunostained for HSP60, HA & GFP after incubation with OA (1 h), measuring the mitochondrial translocation of HA-LC3B in the presence of either GFP-OPTN or GFP-OPTN(F178A) (**c**) and mitochondrial translocation of HA-LC3C in the presence of either GFP-NDP52 or GFP-NDP52(V136S) (**d**). **e, f**, Representative live-cell images of penta KO HeLa cells stably expressing mtKeima & untagged Parkin without expression of a GFP-tagged autophagy receptor (**e**), or co-expressing GFP-p62 (**f**); imaged after incubation with OA for the indicated times. **g, h**, The GFP receptor channels corresponding to Fig. **2c-g**. **i**, FACS analysis of the percentage of 561 nm mtKeima positive cells in penta KO HeLa cells stably expressing mtKeima & untagged Parkin, without expression of a GFP-tagged receptor or co-expressing GFP-p62. **j**, representative GFP & mtKeima FACS plots corresponding to the data shown in Fig. **2e, h**, & Supplementary Fig. **1i**. **k**, Representative iRFP670 & mtKeima FACS plots corresponding to the data shown in Fig. **5g**. Data in **c, d, i** are mean  $\pm$  s.d. from three independent experiments. (two-way ANOVA). ns: not significant. Scale bars: 10  $\mu$ m. (Uncropped immunoblot data are provided in Supplementary Fig. 7)

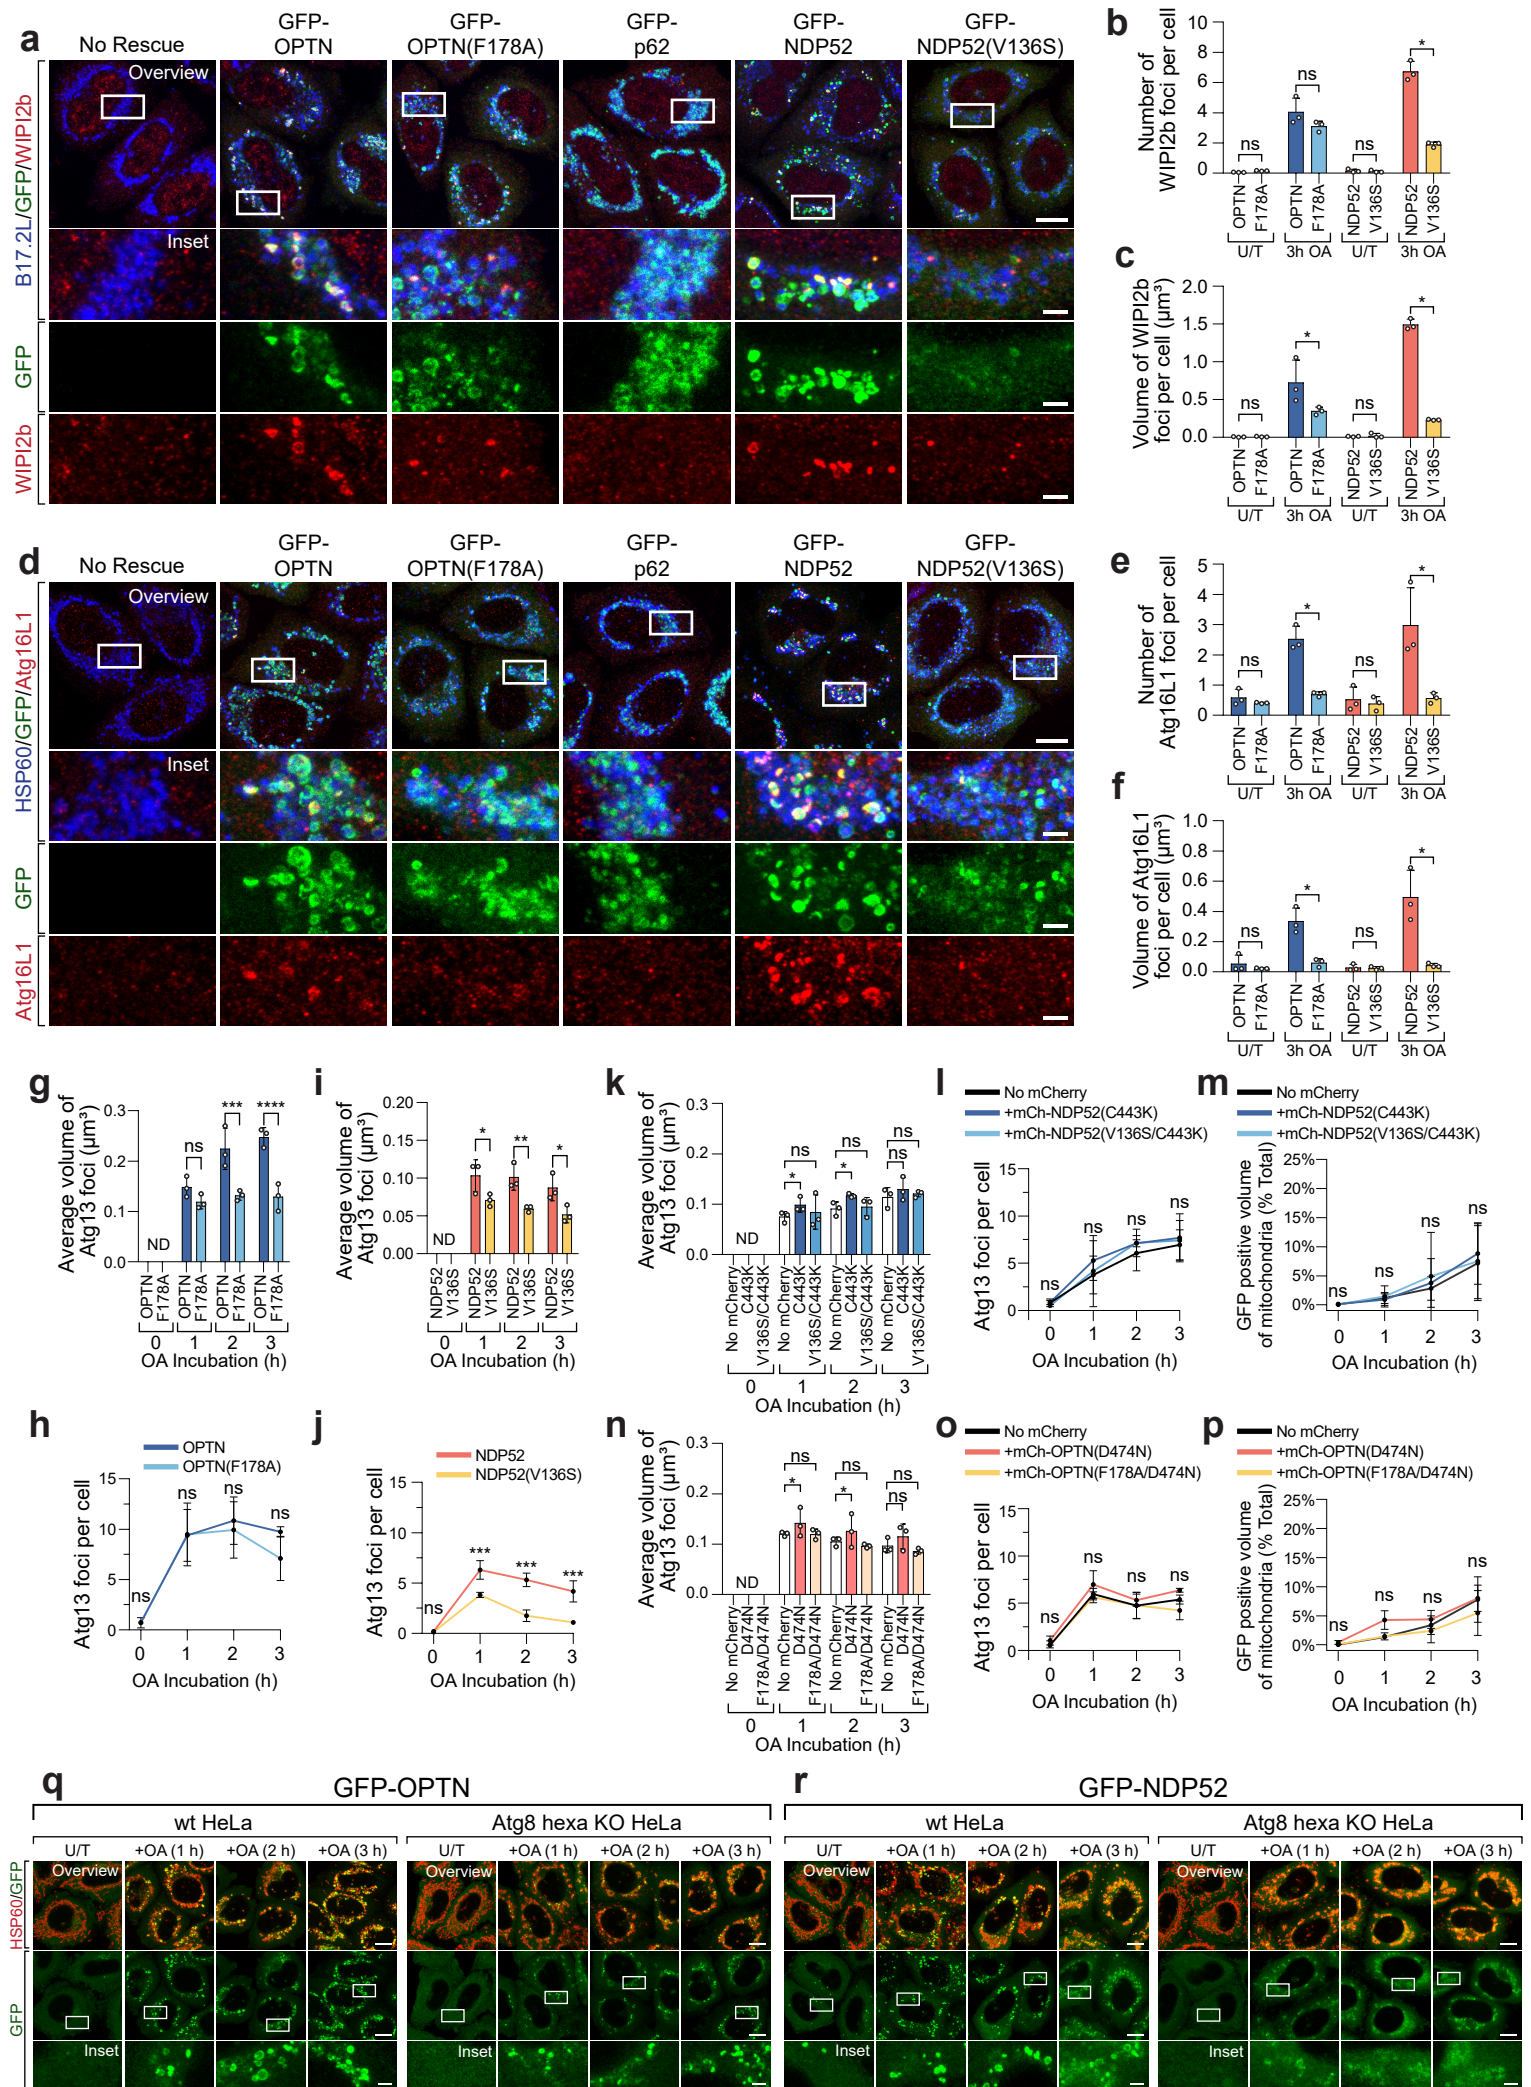

**Supplementary Figure 2: Analysis of autophagy initiation and translocation by LIR mutant autophagy receptors**

**a-c**, Representative images (**a**) and automated image analysis of the average number (**b**) and total volume (**c**) of WIPI2b foci per cell after 3 h treatment with OA, in penta KO HeLa cells stably expressing untagged Parkin, rescued by stable expression of the indicated GFP-tagged receptors and immunostained for B17.2L, GFP & WIPI2b. **d-f**, Representative images (**d**) and automated image analysis of the average number (**e**) and total volume (**f**) of Atg16L1 foci per cell after 3 h treatment with OA, in penta KO HeLa cells stably expressing untagged Parkin, rescued by stable expression of the indicated GFP-tagged receptors and immunostained for HSP60, GFP & Atg16L1. **g-j**, Time-course data from the automated image analyses of Atg13 foci in Fig. **3b, c, e, f**. **k-p**, Image analyses of the average Atg13 foci size (**k, n**), number of Atg13 foci per cell (**l, o**), and GFP-tagged autophagy receptor translocation (**m, p**) corresponding to the time-course analyses shown in Fig. **5b (k, l, m)** and Fig. **5d (n, o, p)**. Quantification of Atg13 foci size in **g, i, k & n** untreated samples were not determined (ND), due to the insufficient number of measurable foci. **q, r**, Representative images of wt HeLa & hexa KO HeLa cells stably expressing untagged Parkin and either GFP-OPTN (**q**) or GFP-NDP52 (**r**); immunostained for HSP60 & GFP after time-course incubation with OA. Data in **b, c, e, f, g-p** are mean  $\pm$  s.d. from three independent experiments. \*P<0.05, \*\*P<0.005, \*\*\*P<0.001, \*\*\*\*P<0.0001 (two-way ANOVA). ns: not significant. Scale bars: overviews, 10  $\mu$ m; insets, 2 $\mu$ m.

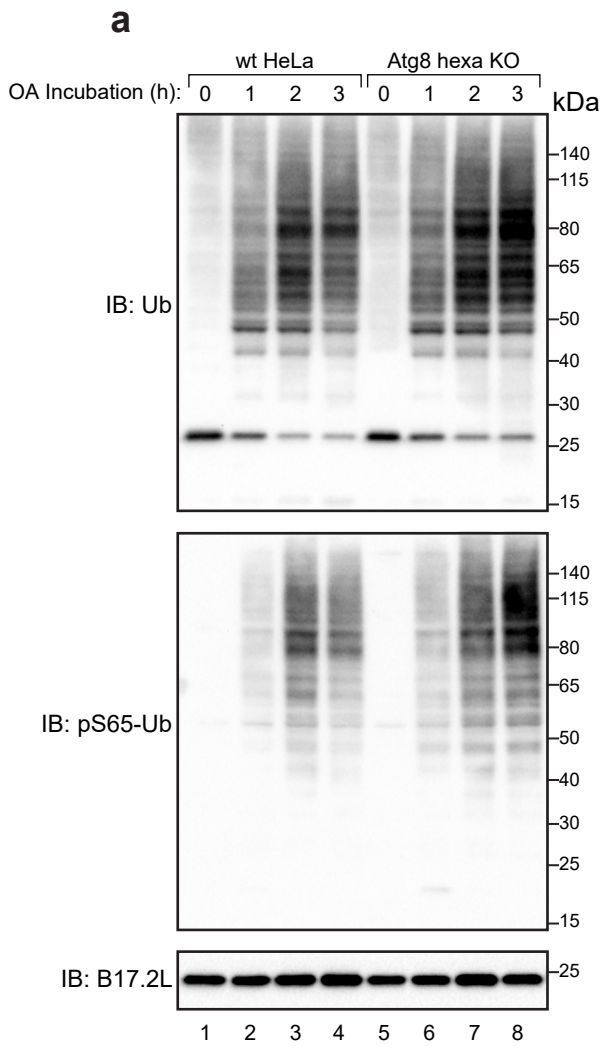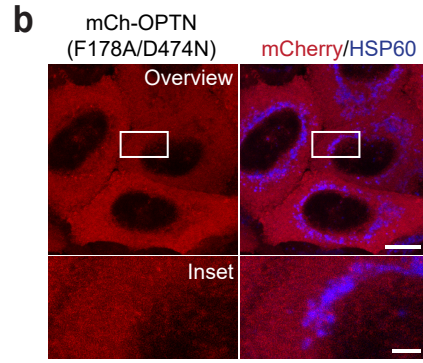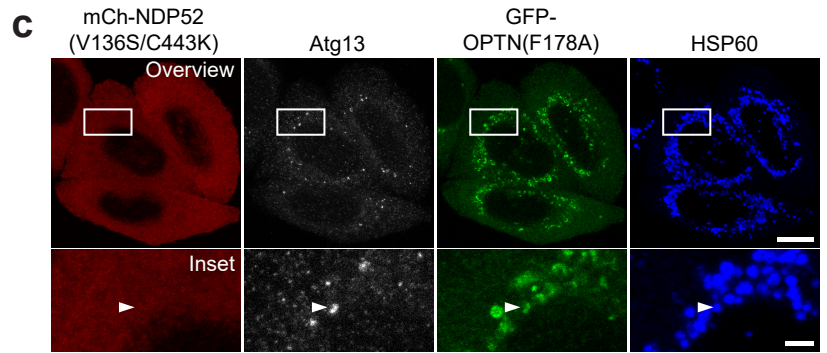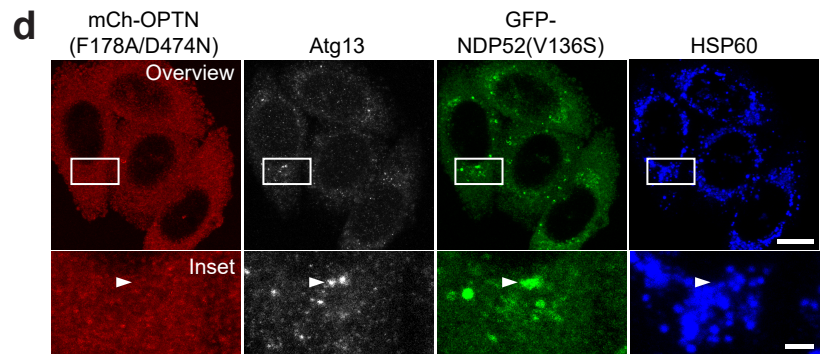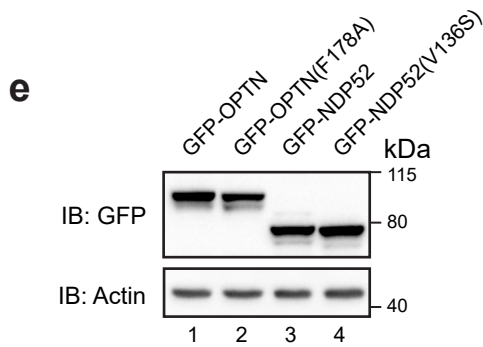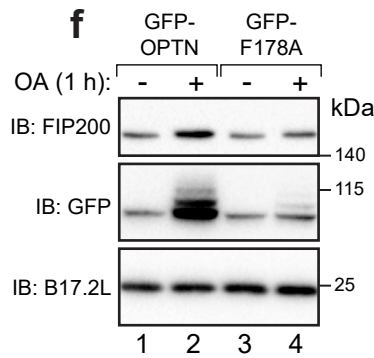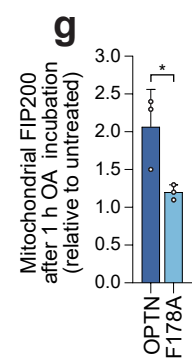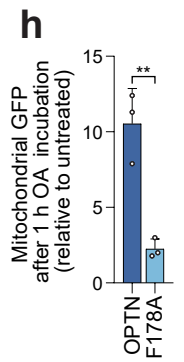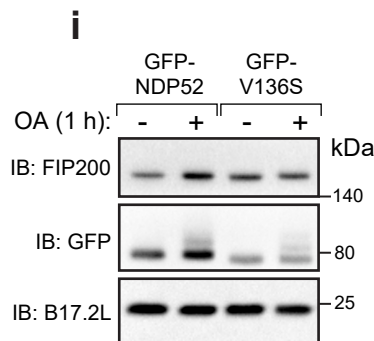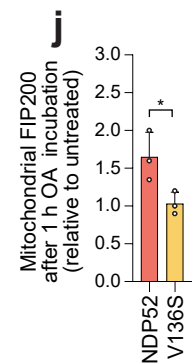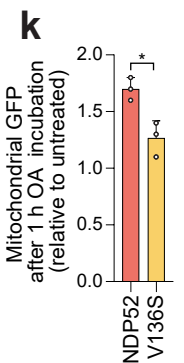

**Supplementary Figure 3: LIR-mediated translocation of autophagy receptors is ubiquitin-independent**

**a**, Mitochondrial fractions from wildtype and hexa KO HeLa cells after incubation with OA as indicated were immunoblotted for total ubiquitin (Ub), S65 phospho-ubiquitin (pS65-Ub) and B17.2L. **b**, Representative images of penta KO cells stably expressing untagged Parkin, with co-expression of mCh-OPTN(F178A/D474N) (**b**), immunostained for HSP60 & mCherry after 3 h incubation with OA. **c, d**, Representative images of penta KO cells stably expressing untagged Parkin with co-expression of either GFP-OPTN(F178A) & mCh-NDP52(V136S/C443K) (**c**), or GFP-NDP52(V136S) & mCh-OPTN(F178A/D474N) (**d**), immunostained for Atg13, HSP60, mCherry & GFP after 3 h incubation with OA. **e**, immunoblot analysis of GFP-tagged autophagy receptor expression in untreated penta KO HeLa cells stably expressing GFP-OPTN, GFP-OPTN(F178A), GFP-NDP52 or GFP-NDP52(V136S). **f-k**, Mitochondrial fractions from Penta KO HeLa cells stably expressing untagged Parkin with co-expression of either GFP-OPTN or GFP-OPTN(F178A) (**f-h**) or either GFP-NDP52 or GFP-NDP52(V136S) (**i-k**) were isolated after 1 h incubation in the presence or absence of OA. Immunoblot quantitation of FIP200 (**g, j**) and GFP-tagged receptors (**h, k**) for analysis of enrichment in the mitochondrial fraction. Data in **g, h, j, k** are mean  $\pm$  s.d. from three independent experiments. \*P<0.05, \*\*P<0.005, (Unpaired student's T-test; two-tailed). ns: not significant. Scale bars: overviews, 10  $\mu$ m; insets, 2 $\mu$ m. (Uncropped immunoblot data are provided in Supplementary Fig. 7)







**Supplementary Figure 4: The LIR-mediated amplification model of autophagosome biogenesis during PINK1/Parkin mitophagy**

**a**, Simplified schematic of multimodal receptor recruitment, in which receptors are initially recruited by phospho-ubiquitin on mitochondria via their UBD. Atg8s are conjugated to the expanding membranes after the initiation of autophagosome biogenesis, resulting in a second round of receptor recruitment via LIR mediated interactions. **b, c**, Schematic representation depicting the reactions used to model PINK1/Parkin activation (**b**) and NDP52 activation (**c**) during mitophagy. The prefix "p" and "a" denotes phosphorylated and active proteins respectively. The corresponding numbered reactions (Supplementary Tables 1, 2) were implemented as outlined in the Methods. **d**, Robustness tests of the mathematical model, in which the reaction constants were randomly perturbed by up to 20% of their original value.

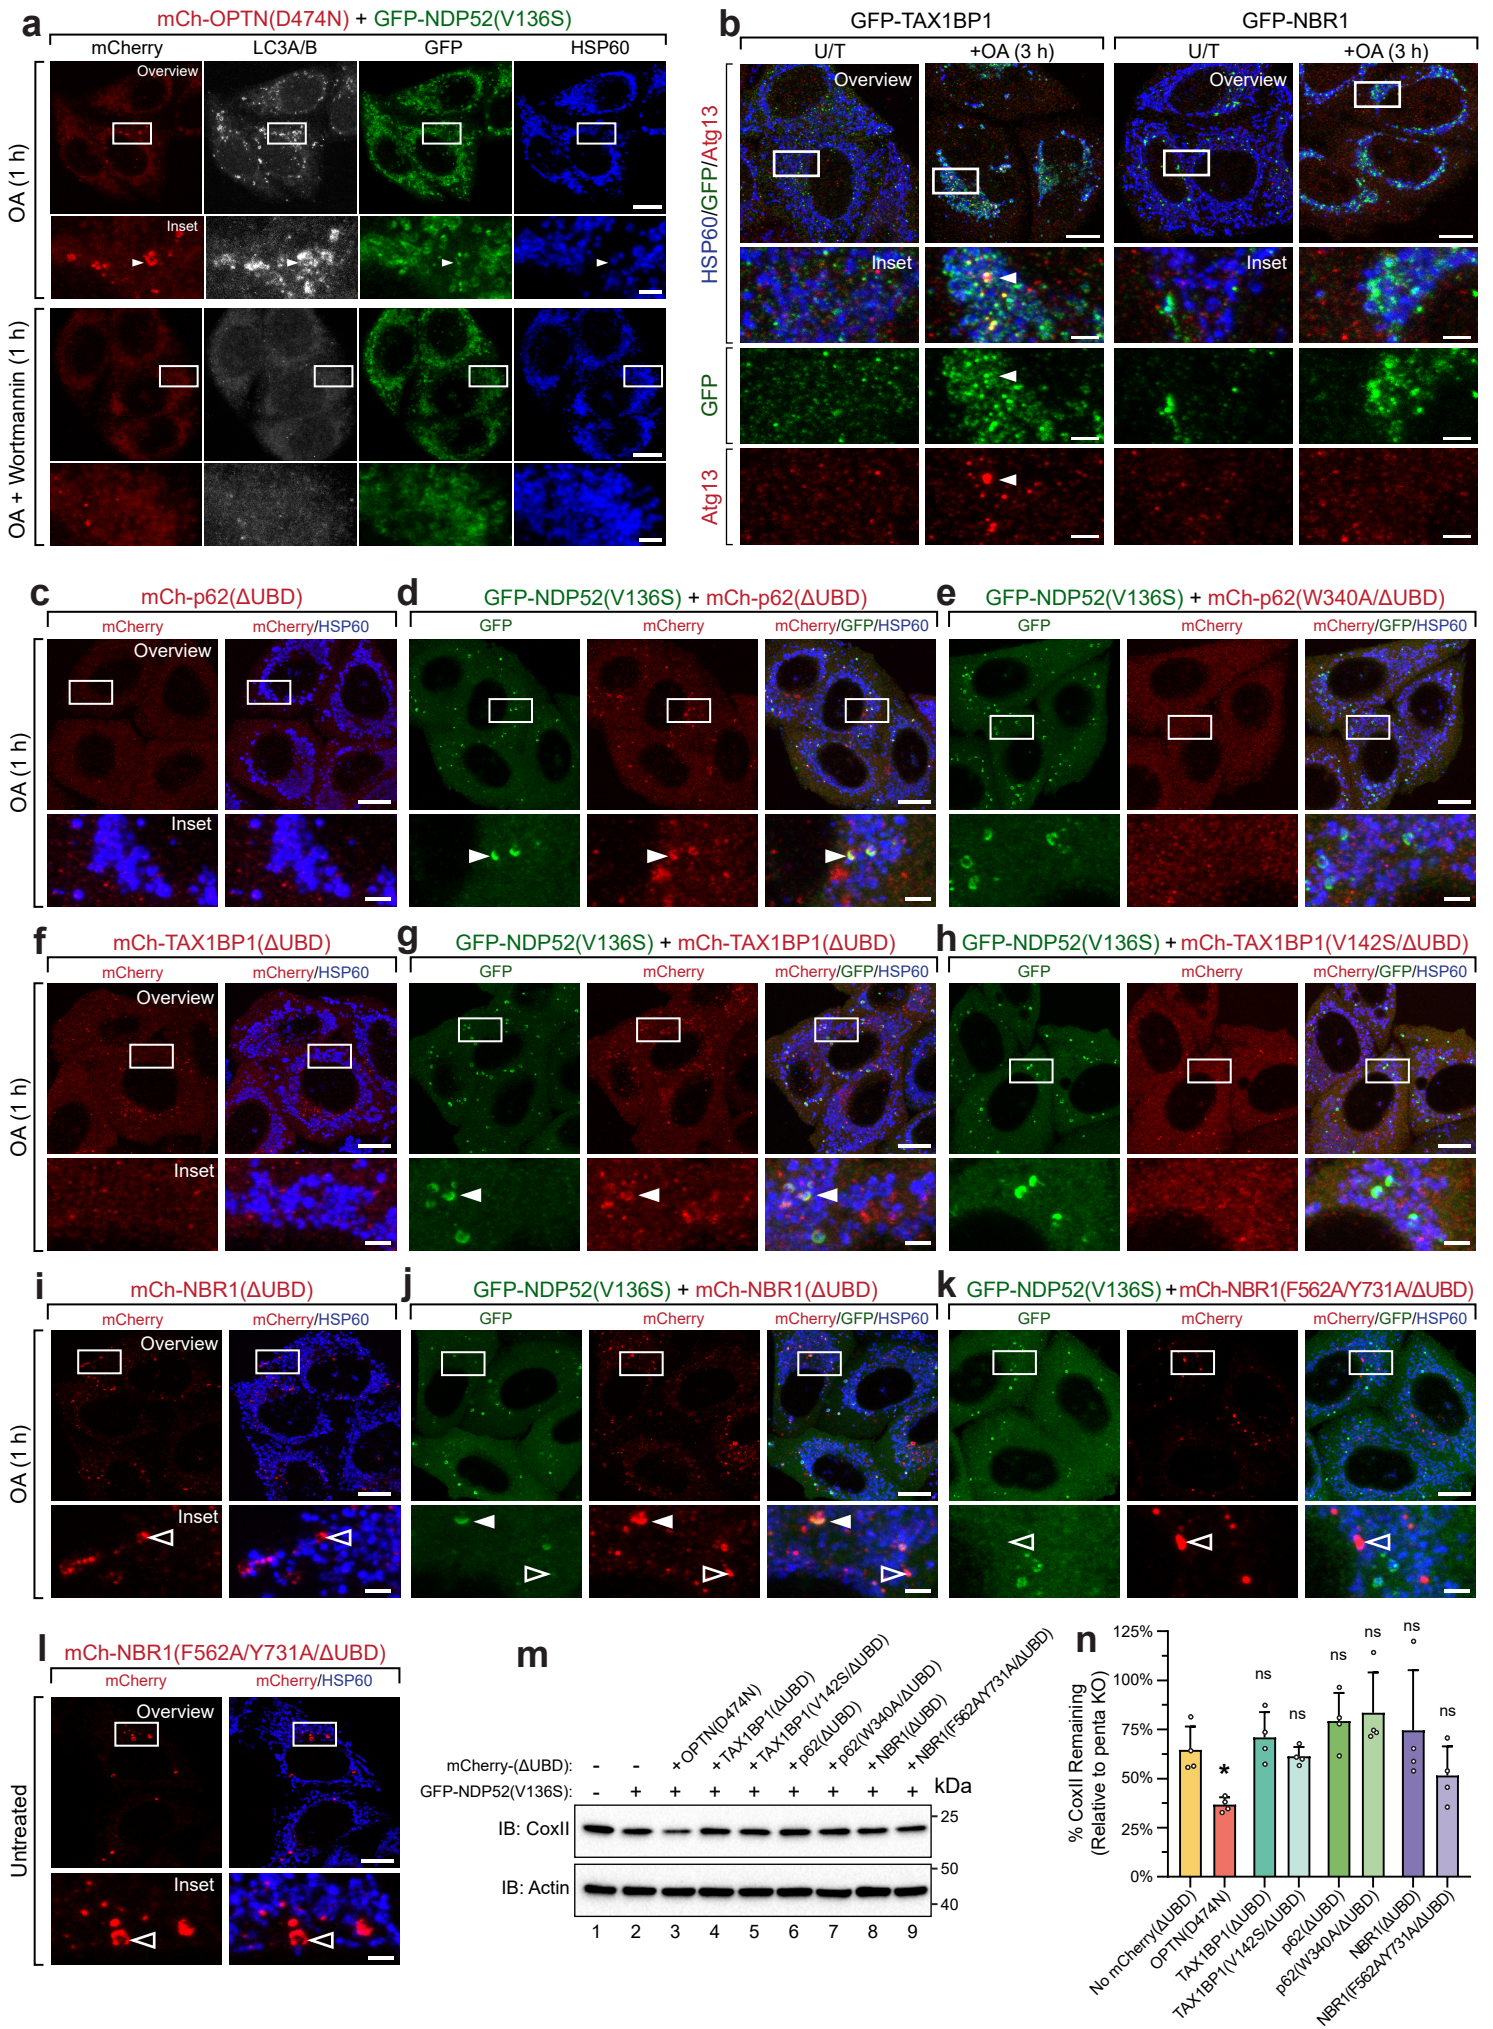

**Supplementary Figure 5: p62, TAX1BP1 & NBR1 are capable of LIR-mediated translocation during PINK1/Parkin mitophagy**

**a**, Representative images of methanol fixed penta KO cells stably expressing untagged Parkin with co-expression of GFP-NDP52(V136S) & mCh-OPTN(D474N), immunostained for LC3A/B, HSP60, GFP & mCherry after 1 h OA treatment in the presence or absence of 1  $\mu$ M wortmannin. **b**, Representative images of penta KO HeLa cells stably expressing untagged Parkin rescued by expression of the indicated GFP-tagged receptors; immunostained for Atg13, HSP60 & GFP after treatment with OA for 3 h. **c-k**, Representative images of penta KO HeLa cells stably expressing untagged Parkin, with co-expression of either mCh-p62( $\Delta$ UBD) (**c**), GFP-NDP52(V136S) & mCh-p62( $\Delta$ UBD) (**d**), GFP-NDP52(V136S) & mCh-p62(W340A/ $\Delta$ UBD) (**e**), mCh-TAX1BP1( $\Delta$ UBD) (**f**), GFP-NDP52(V136S) & mCh-TAX1BP1( $\Delta$ UBD) (**g**), GFP-NDP52(V136S) & mCh-TAX1BP1(V134S/ $\Delta$ UBD) (**h**), mCh-NBR1( $\Delta$ UBD) (**i**), GFP-NDP52(V136S) & mCh-NBR1( $\Delta$ UBD) (**j**), or GFP-NDP52(V136S) & mCh-NBR1(F562A/Y731A/ $\Delta$ UBD) (**k**), after 3 h OA incubation and immunostaining for HSP60, GFP & mCherry. Examples of LIR mediated receptor recruitment are indicated by solid arrowheads; Examples of basal NBR1 localization are indicated by hollow arrowheads. **l**, Representative images of untreated penta KO HeLa cells stably expressing untagged Parkin and mCh-NBR1(F562A/Y731A/ $\Delta$ UBD), with basal NBR1 structures indicated. **m, n**, Penta KO HeLa cells stably expressing untagged Parkin rescued by stable expression of the indicated receptor combinations (shown in **d, e, g, h, j & k**) were analysed by immunoblotting after 8 h incubation with OA (**m**), for quantification of the remaining CoxII levels (**n**). Representative FACS plots demonstrating the expression level of each receptor provided in Supplementary Fig. 6. Data in **n** are mean  $\pm$  s.d. from three independent experiments. \* $P < 0.05$ , (one-way ANOVA). ns: not significant. Scale bars: overviews, 10  $\mu$ m; insets, 2  $\mu$ m. (Uncropped immunoblot data are provided in Supplementary Fig. 7).

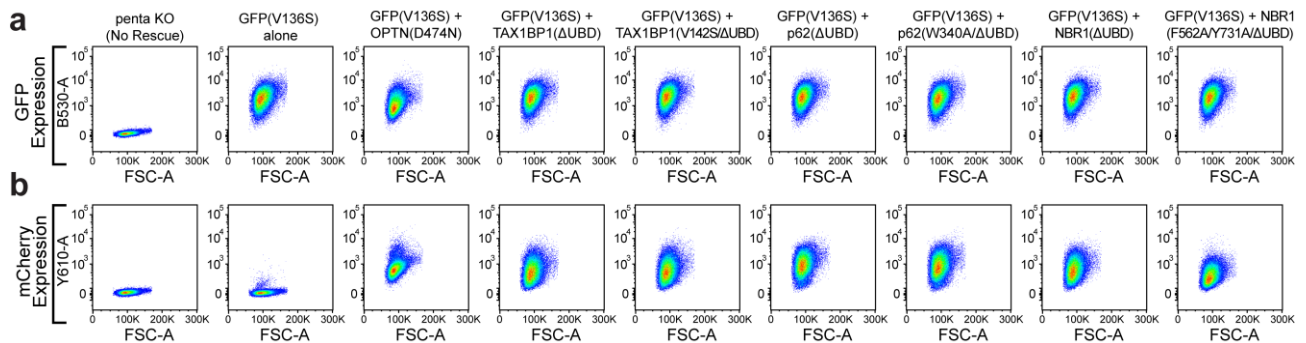

**Supplementary Figure 6: Expression levels for mCherry-tagged  $\Delta$ UBD mutants of TAX1BP1, p62 & NBR1**

**a, b**, representative FACS plots for GFP fluorescence (**a**) and mCherry fluorescence (**b**) in penta KO cells or penta KO cells expressing GFP-NDP52(V136S) alone, or expressing GFP-NDP52(V136S) with either mCh-p62( $\Delta$ UBD), mCh-p62(W340A/ $\Delta$ UBD), mCh-TAX1BP1( $\Delta$ UBD), mCh-TAX1BP1(V134S/ $\Delta$ UBD), mCh-NBR1( $\Delta$ UBD), or mCh-NBR1(F562A/Y731A/ $\Delta$ UBD).



**Fig. 2a**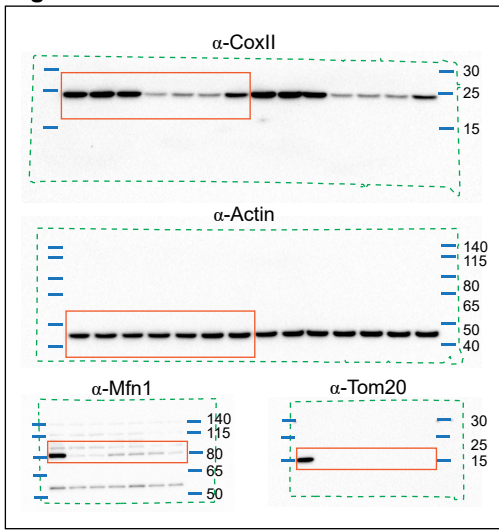**Fig. 5e**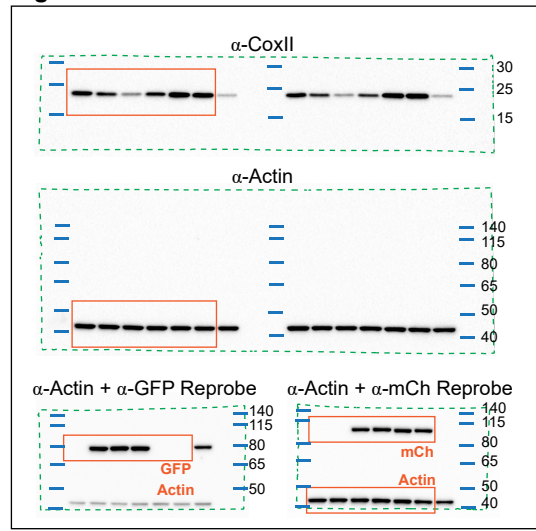**Supplementary Fig. 3a**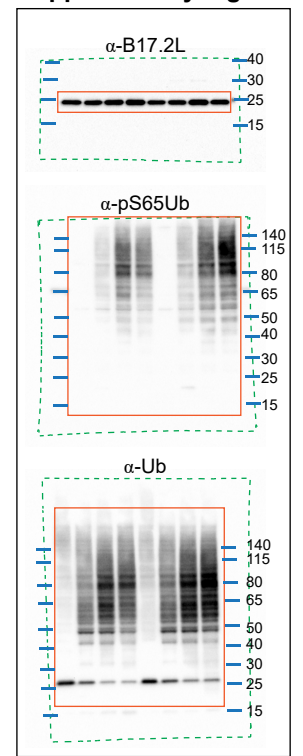**Supplementary Fig. 1a**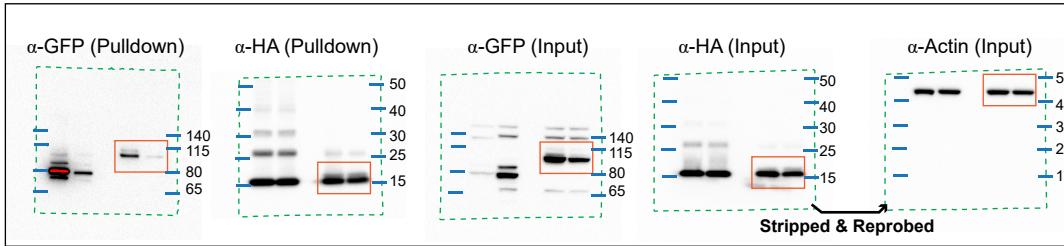**Supplementary Fig. 3e**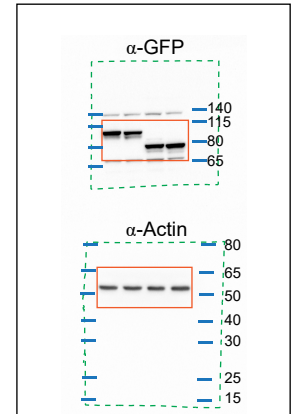**Supplementary Fig. 1b**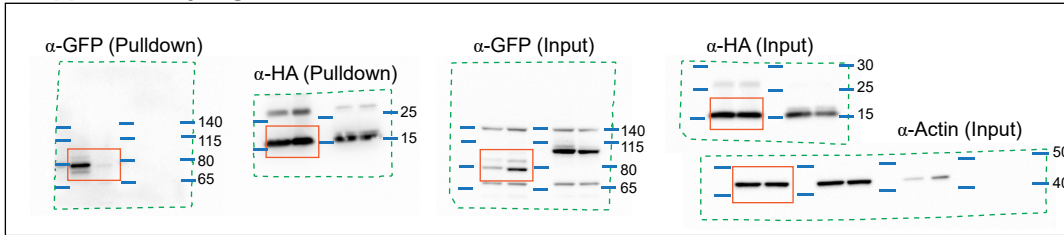**Supplementary Fig. 3f**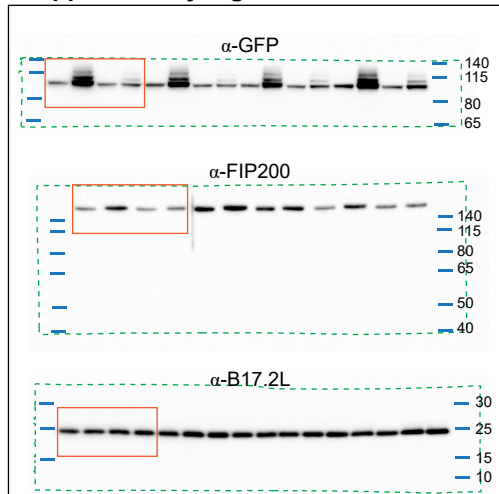**Supplementary Fig. 3i**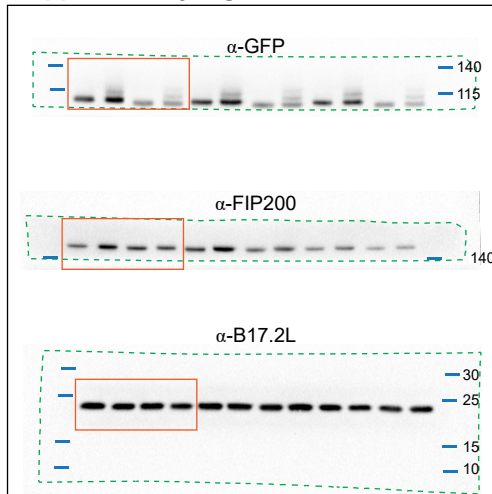**Supplementary Fig. 5m**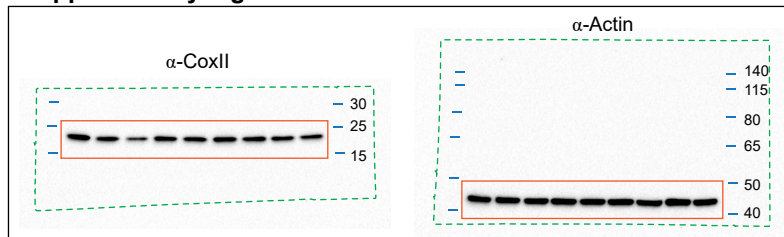**Supplementary Figure 7: Uncropped scans of immunoblots**

Molecular weight marker positions indicated by blue lines, cropped regions indicated by orange lines, perimeters of PVDF membranes indicated by dashed green lines.

**Supplementary Table 1. Reactions and kinetic rates of the PINK1/Parkin/NDP52 model.**  
 Numbered reactions correspond to the model reaction scheme given in Supplementary Fig. 4b, c.

| Reaction number | Reactions                                                | Reaction rates                                                                                                 | Parameter Values                                     |
|-----------------|----------------------------------------------------------|----------------------------------------------------------------------------------------------------------------|------------------------------------------------------|
| 1               | $\rightarrow$ PINK1                                      | $v_1 = k_1$                                                                                                    | $k_1 = 0.1$                                          |
| 2               | PINK1 $\rightarrow$                                      | $v_2 = k_2 \cdot [PINK1]$                                                                                      | $k_2 = 0.01$                                         |
| 3               | PINK1d $\rightarrow$                                     | $v_3 = k_3 \cdot [PINK1d]$                                                                                     | $k_3 = 0.0005$                                       |
| 4               | PINK1 + PINK1<br>$\leftrightarrow$ PINK1d                | $v_4 = k_{4f} \cdot OA \cdot ([PINK1])^2 - k_{4r} \cdot [PINK1d]$                                              | $k_{4f} = 0.001$ ;<br>$OA = 10$ ;<br>$k_{4r} = 0.01$ |
| 5               | nUb $\rightarrow$ Ub                                     | $v_{5basal} = \frac{k_{5basal} \cdot [nUb]}{Km_5 + [nUb]}$                                                     | $k_{5basal} = 0.1$ ;<br>$Km_5 = 50$                  |
|                 | nUb $\rightarrow$ Ub                                     | $v_5 = \frac{k_5 \cdot [pParkinpUb] \cdot [nUb]}{Km_5 + [nUb]}$                                                | $k_5 = 0.01$ ;                                       |
| 6               | Ub $\rightarrow$ nUb                                     | $v_6 = \frac{Vm_6 \cdot [Ub]}{Km_6 + [Ub]}$                                                                    | $Vm_6 = 1$ ;<br>$Km_6 = 50$                          |
| 7               | Ub $\rightarrow$ pUb                                     | $v_7 = \frac{k_7 \cdot [PINK1d] \cdot [Ub]}{Km_7 + [Ub]}$                                                      | $k_7 = 0.01$ ;<br>$Km_7 = 50$                        |
| 8               | pUb $\rightarrow$ Ub                                     | $v_8 = \frac{Vm_8 \cdot [pUb]}{Km_8 + [pUb]}$                                                                  | $Vm_8 = 1$ ;<br>$Km_8 = 50$                          |
| 9               | Parkin + pUb $\leftrightarrow$<br>ParkinpUb              | $v_9 = k_{9f} \cdot [Parkin] \cdot [pUb] - k_{9r} \cdot [ParkinpUb]$                                           | $k_{9f} = 0.001$ ;<br>$k_{9r} = 0.01$                |
| 10              | ParkinpUb $\rightarrow$<br>pParkinpUb                    | $v_{10} = \frac{k_{10} \cdot [PINK1d] \cdot [ParkinpUb]}{Km_{10} + [ParkinpUb]}$                               | $k_{10} = 0.008$ ;<br>$Km_{10} = 50$                 |
| 11              | pParkinpUb $\rightarrow$<br>ParkinpUb                    | $v_{11} = \frac{V_{11} \cdot [pParkinpUb]}{Km_{11} + [pParkinpUb]}$                                            | $V_{11} = 5$ ;<br>$Km_{11} = 50$                     |
| 12              | NDP52 + pUb $\leftrightarrow$<br>NDP52pUb                | $v_{12} = k_{12f} \cdot [NDP52] \cdot [pUb] - k_{12r} \cdot [NDP52pUb]$                                        | $k_{12f} = 0.01$ ;<br>$k_{12r} = 0.01$               |
| 13              | NDP52pUb +<br>Atg8PE $\leftrightarrow$<br>NDP52pUbAtg8PE | $v_{13} = k_{13f} \cdot [NDP52pUb] \cdot [Atg8PE] - k_{13r} \cdot [NDP52pUbAtg8PE]$                            | $k_{13f} = 0.01$ ;<br>$k_{13r} = 0.01$               |
| 14              | ULK1 $\rightarrow$ aULK1                                 | $v_{14c} = \frac{k_{14} \cdot ([NDP52pUb] + [NDP52Atg8PE] + [NDP52pUbAtg8PE]) \cdot [ULK1]}{Km_{14} + [ULK1]}$ | $k_{14} = 0.0023$ ;<br>$Km_{14} = 38$                |
| 15              | aULK1 $\rightarrow$ ULK1                                 | $v_{15} = \frac{V_{15} \cdot [aULK1]}{Km_{15} + [aULK1]}$                                                      | $V_{15} = 0.24$ ;<br>$Km_{15} = 5$                   |
| 16              | PtdIns $\rightarrow$<br>PtdIns(3)P                       | $v_{16} = \frac{k_{16} \cdot [aULK1] \cdot [PtdIns]}{Km_{16} + [PtdIns]}$                                      | $k_{16} = 0.00018$ ;<br>$Km_{16} = 2.3$              |
| 17              | PtdIns(3)P $\rightarrow$<br>PtdIns                       | $v_{17} = \frac{V_{17} \cdot [PtdIns(3)P]}{Km_{17} + [PtdIns(3)P]}$                                            | $V_{17} = 0.211$ ;<br>$Km_{17} = 85$ ;               |
| 18              | Atg8 $\rightarrow$ Atg8PE                                | $v_{18} = \frac{k_{18} \cdot [Atg8] \cdot [PtdIns(3)P]}{Km_{18} + [Atg8]}$                                     | $k_{18} = 0.144$ ;<br>$Km_{18} = 32$                 |
| 19              | Atg8PE $\rightarrow$ Atg8                                | $v_{18} = \frac{V_{19} \cdot [Atg8PE]}{Km_{19} + [Atg8PE]}$                                                    | $k_{19} = 0.385$ ;<br>$Km_{19} = 173$                |
| 20              | NDP52 + Atg8PE<br>$\leftrightarrow$<br>NDP52Atg8PE       | $v_{20} = k_{13f} \cdot [NDP52] \cdot [Atg8PE] - k_{13r} \cdot [NDP52Atg8PE]$                                  | Same rates as reaction 13                            |
| 21              | NDP52Atg8PE +<br>pUb $\leftrightarrow$<br>NDP52pUbAtg8PE | $v_{21} = k_{12f} \cdot [NDP52Atg8PE] \cdot [pUb] - k_{12r} \cdot [NDP52pUbAtg8PE]$                            | Same rates as reaction 12                            |

**Supplementary Table 2. The ordinary differential equations and initial conditions of the PINK1/Parkin/NDP52 model.** The reaction rates ( $v_n$ ) are given in Supplementary Table 1.

| Ordinary Differential Equations                   | Initial Concentrations (nM) |
|---------------------------------------------------|-----------------------------|
| $\frac{d[PINK1]}{dt} = v_1 - v_2 - v_4$           | 10                          |
| $\frac{d[PINK1d]}{dt} = -v_3 + v_4$               | 0                           |
| $\frac{d[nUb]}{dt} = -v_5 + v_6$                  | 500                         |
| $\frac{d[Ub]}{dt} = v_5 - v_6 - v_7 + v_8$        | 0                           |
| $\frac{d[pUb]}{dt} = v_7 - v_8 - v_9 - v_{12}$    | 0                           |
| $\frac{d[Parkin]}{dt} = -v_9$                     | 500                         |
| $\frac{d[ParkinpUb]}{dt} = v_9 - v_{10} + v_{11}$ | 0                           |
| $\frac{d[pParkinpUb]}{dt} = v_{10} - v_{11}$      | 0                           |
| $\frac{d[NDP52]}{dt} = -v_{12} - v_{20}$          | 100                         |
| $\frac{d[NDP52pUb]}{dt} = v_{12} - v_{13}$        | 0                           |
| $\frac{d[NDP52pUbAtg8PE]}{dt} = v_{13} + v_{21}$  | 0                           |
| $\frac{d[NDP52Atg8PE]}{dt} = v_{20} - v_{21}$     | 0                           |
| $\frac{d[ULK1]}{dt} = -v_{14} + v_{15}$           | 100                         |
| $\frac{d[aULK1]}{dt} = v_{14} - v_{15}$           | 0                           |
| $\frac{d[PtdIns]}{dt} = v_{17} - v_{16}$          | 100                         |
| $\frac{d[PtdIns(3)P]}{dt} = v_{16} - v_{17}$      | 0                           |
| $\frac{d[Atg8]}{dt} = -v_{18} + v_{19}$           | 500                         |
| $\frac{d[Atg8PE]}{dt} = v_{18} - v_{19} - v_{20}$ | 0                           |



**Table S3. Primers used in this study**

| Gene                   | Application   | Direction | Sequence                                                 |
|------------------------|---------------|-----------|----------------------------------------------------------|
| mCherry                | Amplification | Fwd       | tctagactgccgccaccatgGTGAGCAAGGGCGAGGAG                   |
| mCherry                | Amplification | Rev       | gctcgagatctgagtcgggaCTTGTACAGCTCGTCCATGC                 |
| iRFP670                | Amplification | Fwd       | tctagactgccgccaccatgGCGCGTAAGGTGCATCTCACCTC              |
| iRFP670                | Amplification | Rev       | gctcgagatctgagtcgggaGCGTTGGTGGTGGGCGGC                   |
| OPTN                   | Amplification | Fwd       | ggactcagatctcgagctcaagctTCCCATCAACCTCTCAGC               |
| OPTN                   | Amplification | Rev       | tcagttatctagatccggtgatccTTAAATGATGCAATCCATCACG           |
| NDP52                  | Amplification | Fwd       | ggactcagatctcgagctcaagcttgGAGGAGACCATCAAAGATC            |
| NDP52                  | Amplification | Rev       | tcagttatctagatccggtgatccTCAGAGAGAGTGGCAGAAC              |
| NDP52(C443K)           | Mutagenesis   | Fwd       | ggactcagatctcgagctcaagcttgGAGGAGACCATCAAAGATCCCC<br>CCAC |
| NDP52(C443K)           | Mutagenesis   | Rev       | tcagttatctagatccggtgatccTCAGAGAGAGTGTGTTGAACACGTG<br>GTC |
| P62                    | Amplification | Fwd       | actcagatctcgagctcaagcttgGCGTCGCTCACCGTGAAG               |
| P62                    | Amplification | Rev       | agttatctagatccggtgatccctcaCAACGGCGGGGGATGCTT             |
| P62( $\Delta$ UBD)     | Amplification | Rev       | tcagttatctagatccggtgatccctcaGAGATGTGGGTACAAGGCAGC        |
| P62(W340A)             | Mutagenesis   | Fwd       | GAGGAGATGATGACGCGACCCATCTGTCTTC                          |
| P62(W340A)             | Mutagenesis   | Rev       | GAAGACAGATGGGTGCGGTCATCATCTCCTC                          |
| TAX1BP1                | Amplification | Fwd       | actcagatctcgagctcaagcttgACATCCTTTCAAGAAGTCC              |
| TAX1BP1                | Amplification | Rev       | agttatctagatccggtgatccctcaGTCAAAATTTAGAACATTCTGATC       |
| TAX1BP1( $\Delta$ UBD) | Amplification | Rev       | tcagttatctagatccggtgatccctcaCACCTTCCAGTGACTTTC           |
| TAX1BP1(V142S)         | Mutagenesis   | Fwd       | GAAATTCTGACATGTTAGTGAGCACCACAAAAGCAGGCC<br>TTC           |
| TAX1BP1(V142S)         | Mutagenesis   | Rev       | GAAGGCCTGCTTTTGTGGTGCTACTAACATGTCAGAATT<br>TC            |
| NBR1                   | Amplification | Fwd       | actcagatctcgagctcaagcttgGAACCACAGGTTACTCTAAATG           |
| NBR1                   | Amplification | Rev       | agttatctagatccggtgatccctcaATAGCGTTGGCTGTACCAG            |
| NBR1( $\Delta$ UBD)    | Amplification | Rev       | tcagttatctagatccggtgatccctcaTGGTGGCCAGCAAACAG            |
| NBR1(F562A)            | Mutagenesis   | Fwd       | CCCAGGACCTGCTGTCCGACAGAGCTGTTGGATATAAAC                  |
| NBR1(F562A)            | Mutagenesis   | Rev       | GTTTATATCCAACAGCTCTGCGGACAGCAGGTCCTGGG                   |
| NBR1(Y731A)            | Mutagenesis   | Fwd       | CTTCCTCAGAGGATGCCATCATCATCCTGCC                          |
| NBR1(Y731A)            | Mutagenesis   | Rev       | GGCAGGATGATGATGGCATCCTCTGAGGAAG                          |
